# Supplementary material
Source: MDPI journal article supplement (https://www.mdpi.com/2079-6412/14/5/574)
Supplement: s1 [file s1]

Supplementary Material

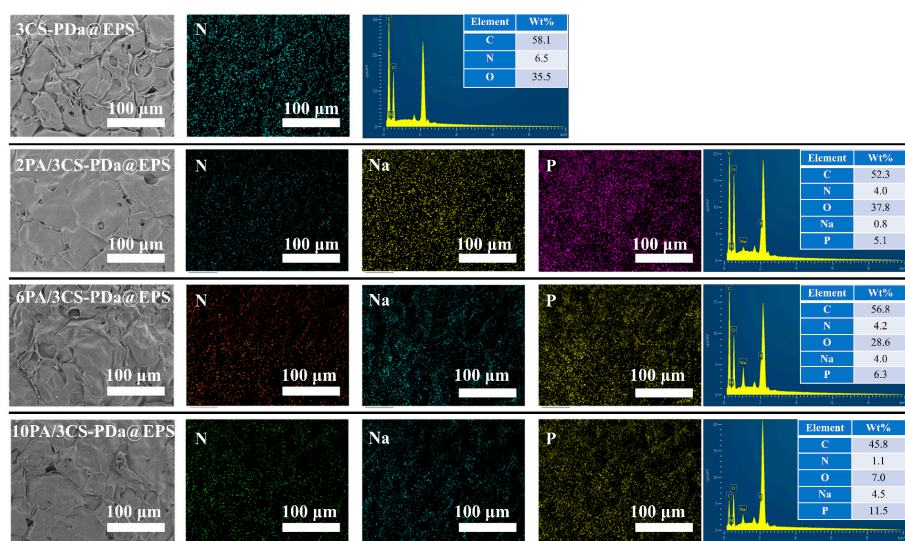

**Figure S1.** Elemental mapping (N, Na, P elements) of modified-EPS particles recorded with SEM-EDS.
